# Supplementary material for: A consensus subunit-specific model for annotation of substrate specificity for ABC transporters
Source: Royal Society of Chemistry journal article supplement (doi:10.1039/c5ra05304h), 2015-01-01
Supplement: c5ra05304h1.pdf [file c5ra05304h1.pdf]

**Table S1.** The performance of the permease-specific models on different feature sets using training set and 5-fold cross validation.

| Method            | Sensitivity (%) | Specificity (%) | Accuracy (%) | MCC    |
|-------------------|-----------------|-----------------|--------------|--------|
| AAC <sup>a</sup>  | 64.34           | 88.76           | 85.03        | 0.5527 |
| CTD <sup>b</sup>  | 57.44           | 87.78           | 83.87        | 0.5032 |
| AAI <sup>c</sup>  | 56.15           | 87.56           | 82.88        | 0.4500 |
| PSSM <sup>d</sup> | 76.38           | 91.94           | 89.59        | 0.7078 |
| AAC+CTD           | 57.17           | 87.58           | 83.87        | 0.4647 |
| AAC+AAI           | 59.57           | 88.17           | 84.56        | 0.4970 |
| AAC+PSSM          | 68.86           | 90.95           | 88.18        | 0.6169 |
| CTD+AAI           | 59.89           | 87.96           | 84.06        | 0.5081 |
| CTD+PSSM          | 58.45           | 88.09           | 84.32        | 0.5100 |
| AAI+PSSM          | 74.95           | 91.77           | 89.40        | 0.6926 |
| AAC+CTD+AAI       | 56.19           | 87.52           | 83.13        | 0.4596 |
| AAC+CTD+PSSM      | 55.93           | 87.13           | 82.63        | 0.4629 |
| AAC+AAI+PSSM      | 72.91           | 91.06           | 88.39        | 0.6531 |
| CTD+AAI+PSSM      | 70.00           | 90.98           | 88.40        | 0.6486 |
| AAC+CTD+AAI+PSSM  | 54.59           | 87.24           | 83.31        | 0.4546 |

<sup>a</sup> AAC: amino acid composition; <sup>b</sup>CTD: composition transition and distribution; <sup>c</sup>AAI: biochemical properties (AAindex); <sup>d</sup> PSSM: position-specificscoring matrix.

**Table S2.** The performance of the ATP binding protein-specific models on different feature sets using training set and 5-fold cross validation.

| Method            | Sensitivity (%) | Specificity (%) | Accuracy (%) | MCC    |
|-------------------|-----------------|-----------------|--------------|--------|
| AAC <sup>a</sup>  | 44.78           | 80.78           | 72.76        | 0.2615 |
| CTD <sup>b</sup>  | 56.25           | 84.27           | 75.30        | 0.4353 |
| AAI <sup>c</sup>  | 43.47           | 79.71           | 70.31        | 0.2263 |
| PSSM <sup>b</sup> | 57.28           | 85.33           | 79.26        | 0.4348 |
| AAC+CTD           | 56.25           | 84.27           | 75.30        | 0.4353 |
| AAC+AAI           | 44.92           | 80.93           | 72.79        | 0.2388 |
| AAC+PSSM          | 44.78           | 80.78           | 72.76        | 0.2615 |
| CTD+AAI           | 55.68           | 84.44           | 77.19        | 0.4429 |
| CTD+PSSM          | 50.75           | 83.10           | 76.74        | 0.3488 |
| AAI+PSSM          | 64.81           | 86.61           | 80.36        | 0.5050 |
| AAC+CTD+AAI       | 50.23           | 82.88           | 74.86        | 0.3684 |
| AAC+CTD+PSSM      | 53.53           | 82.52           | 75.29        | 0.3632 |
| AAC+AAI+PSSM      | 58.62           | 85.99           | 79.71        | 0.4648 |
| CTD+AAI+PSSM      | 57.26           | 83.96           | 76.74        | 0.4233 |
| AAC+CTD+AAI+PSSM  | 52.62           | 83.25           | 74.79        | 0.3738 |

<sup>a</sup> AAC: amino acid composition; <sup>b</sup> CTD: composition transition and distribution; <sup>c</sup> AAI: biochemical properties (AAindex); <sup>d</sup> PSSM: position-specific scoring matrix.

**Table S3.** The performance of the substrate binding protein-specific models on different feature sets using training set and 5-fold cross validation.

| Method            | Sensitivity (%) | Specificity (%) | Accuracy (%) | MCC    |
|-------------------|-----------------|-----------------|--------------|--------|
| AAC <sup>a</sup>  | 34.79           | 73.44           | 62.16        | 0.0803 |
| CTD <sup>b</sup>  | 49.56           | 75.28           | 67.23        | 0.2483 |
| AAI <sup>c</sup>  | 41.21           | 76.22           | 65.21        | 0.1783 |
| PSSM <sup>d</sup> | 80.94           | 87.71           | 86.12        | 0.6784 |
| AAC+CTD           | 50.95           | 74.73           | 68.53        | 0.2856 |
| AAC+AAI           | 43.22           | 72.74           | 63.74        | 0.1487 |
| AAC+PSSM          | 79.49           | 85.47           | 83.08        | 0.6278 |
| CTD+AAI           | 61.21           | 76.29           | 71.86        | 0.3699 |
| CTD+PSSM          | 65.78           | 79.02           | 74.51        | 0.4293 |
| AAI+PSSM          | 67.54           | 81.22           | 78.64        | 0.4954 |
| AAC+CTD+AAI       | 52.05           | 76.34           | 70.33        | 0.3078 |
| AAC+CTD+PSSM      | 56.29           | 77.54           | 72.82        | 0.3482 |
| AAC+AAI+PSSM      | 69.41           | 82.82           | 77.25        | 0.5029 |
| CTD+AAI+PSSM      | 68.86           | 80.04           | 75.75        | 0.4747 |
| AAC+CTD+AAI+PSSM  | 70.59           | 79.38           | 76.85        | 0.4846 |

<sup>a</sup>AAC: amino acid composition; <sup>b</sup>CTD: composition transition and distribution; <sup>c</sup>AAI: biochemical properties (AAindex); <sup>d</sup>PSSM: position-specific scoring matrix.

**Table S4.** The performance of the uniform models with different feature sets on the training set of all proteins and 5-fold cross validation.

| Method            | Sensitivity (%) | Specificity (%) | Accuracy (%) | MCC    |
|-------------------|-----------------|-----------------|--------------|--------|
| AAC <sup>a</sup>  | 44.27           | 82.97           | 75.74        | 0.2727 |
| CTD <sup>b</sup>  | 51.91           | 84.92           | 78.57        | 0.3896 |
| AAI <sup>c</sup>  | 47.95           | 83.66           | 76.23        | 0.3167 |
| PSSM <sup>d</sup> | 64.53           | 88.07           | 83.29        | 0.5503 |
| AAC+CTD           | 52.95           | 84.32           | 77.45        | 0.3841 |
| AAC+AAI           | 45.58           | 82.98           | 75.61        | 0.2953 |
| AAC+PSSM          | 58.86           | 86.49           | 80.74        | 0.5005 |
| CTD+AAI           | 56.63           | 85.08           | 78.76        | 0.4278 |
| CTD+PSSM          | 49.65           | 83.40           | 76.26        | 0.3551 |
| AAI+PSSM          | 66.47           | 88.64           | 84.22        | 0.5821 |
| AAC+CTD+AAI       | 61.26           | 88.10           | 83.03        | 0.5356 |
| AAC+CTD+PSSM      | 57.33           | 85.68           | 79.96        | 0.4493 |
| AAC+AAI+PSSM      | 68.82           | 89.47           | 85.02        | 0.5881 |
| CTD+AAI+PSSM      | 48.50           | 83.15           | 76.38        | 0.3430 |
| AAC+CTD+AAI+PSSM  | 53.88           | 85.01           | 78.64        | 0.4074 |

<sup>a</sup> AAC: amino acid composition; <sup>b</sup>CTD: composition transition and distribution; <sup>c</sup>AAI: biochemical properties (AAindex); <sup>d</sup>PSSM: position-specific scoring matrix.

**Table S5.** The performance of BLAST on test data set.

| Transporter class  | Sensitivity (%) | Specificity (%) | Accuracy (%) | MCC    | Total unclassified(%) |
|--------------------|-----------------|-----------------|--------------|--------|-----------------------|
| Sugar              | 66.67           | 95.31           | 90.79        | 0.6424 |                       |
| Ion                | 81.25           | 98.33           | 94.74        | 0.8369 | 20.83                 |
| Amino acid/protein | 72.73           | 88.89           | 84.21        | 0.6162 |                       |
| Others             | 73.08           | 80.00           | 77.63        | 0.5184 |                       |
